# Supplementary material for: Role of ANGPTL8 in NAFLD Improvement after Bariatric Surgery in Experimental and Human Obesity
Source: MDPI journal article supplement (doi:10.3390/ijms222312945), 2021-11-30
Supplement: s1 [file s1]

**Table S1.** Sequences of primers and TaqMan® probes.

| Gene<br>(GenBank accession no.)    | Oligonucleotide sequence (5'-3')       | Nucleotides |
|------------------------------------|----------------------------------------|-------------|
| <b>Rat</b>                         |                                        |             |
| <i>Angptl8</i><br>(NM_001271710.1) |                                        |             |
| Forward                            | TTGTCGGAGATTCAGGCAGAA                  | 304-324     |
| Reverse                            | GAACAGTGTACGGAGACTACAAGTGC             | 402-427     |
| Probe                              | FAM-TACACCTTCGAGCAGAA-TAMRA            | 334-351     |
| <b>Human</b>                       |                                        |             |
| <i>ANGPTL8</i><br>(NM_018687.7)    |                                        |             |
| Forward                            | TCTTAAAGGCTCACGCTGACAA                 | 471-492     |
| Reverse                            | ATGGTGGCACAGCAGCATC                    | 548-566     |
| Probe                              | FAM-AGCCACATCCTATGGGCCCTCACAG-TAMRA    | 497-521     |
| <i>HNF4A</i><br>(NM_000457.5)      |                                        |             |
| Forward                            | GTGCGTGGTGGACAAAGACA                   | 437-456     |
| Reverse                            | GAAGAAGGAAGCCGTCCAGAA                  | 509-529     |
| Probe                              | FAM-CTCAAGAAATGCTTCCGGGCTGGCA-TAMRA    | 483-507     |
| <i>DGAT1</i><br>(NM_012079.6)      |                                        |             |
| Forward                            | GCTACCCGGACAATCTGACCTA                 | 941-962     |
| Reverse                            | TTGAGATGCTGTTCTTCACCCA                 | 1064-1085   |
| Probe                              | FAM-TACTTCCTCTTCGCCCCCACCTTGTG-TAMRA   | 971-1001    |
| <i>MOGAT2</i><br>(NM_025098.4)     |                                        |             |
| Forward                            | TTCGATCTTCCCCGGTATCC                   | 438-457     |
| Reverse                            | TGTCTGCAGGGTTGGTCACA                   | 518-537     |
| Probe                              | FAM-ATGATGCTGACCTTGTGGTTCCGGG-TAMRA    | 469-493     |
| <i>PPARG2</i><br>(NM_015869.4)     |                                        |             |
| Forward                            | AGCCTCATGAAGAGCCTTCCA                  | 465-485     |
| Reverse                            | TTGTGAAGGATGCAAGGGTTTC                 | 556-577     |
| Probe                              | FAM-TCCCTCATGGCAATTGAATGTCGTGTC-TAMRA  | 488-514     |
| <i>SREBF1</i><br>(NM_004176.5)     |                                        |             |
| Forward                            | ACATCGAAGACATGCTTCAGCTT                | 252-274     |
| Reverse                            | TTTGACCCACCCTATGCTGG                   | 308-327     |
| Probe                              | FAM-CAACAACCAAGACAGTGACTTCCCTGGC-TAMRA | 277-304     |

*ANGPTL8*, angiotensin-like protein 8; *DGAT1*, diacylglycerol *O*-acyltransferase 1; *HNF4A*, hepatocyte nuclear factor 4  $\alpha$ ; *MOGAT2*, monoacylglycerol *O*-acyltransferase 2; *PPARG2*, peroxisome proliferator-activated receptor  $\gamma$  2; *SREBF1*, sterol regulatory element-binding transcription factor 1.

**Table S2.** Multiple linear regression analyses with plasma ANGPTL8 as dependent variable for all the participants in the cross-sectional study.

| <i>Plasma ANGPTL8</i>   |         |              |
|-------------------------|---------|--------------|
| <i>Model I</i>          | $\beta$ | <i>P</i>     |
| Age                     | -0.001  | 0.994        |
| Sex                     | -4.889  | 0.115        |
| BMI                     | -0.009  | 0.947        |
| HOMA                    | -1.104  | <b>0.003</b> |
| Adipo-IR                | 0.025   | 0.088        |
| Insulin                 | 0.217   | 0.082        |
| Adjusted R <sup>2</sup> | 0.101   | <b>0.049</b> |
| <i>Model II</i>         | $\beta$ | <i>P</i>     |
| Age                     | -0.070  | 0.671        |
| Sex                     | -8.695  | <b>0.025</b> |
| BMI                     | 0.346   | 0.180        |
| $\gamma$ -GT            | -0.231  | <b>0.045</b> |
| Hepatic steatosis       | -2.294  | 0.350        |
| Adjusted R <sup>2</sup> | 0.110   | <b>0.046</b> |

BMI, body mass index; HOMA, homeostasis model assessment. The coefficient of dichotomous variable Sex from the regression represents the effect of male relative to female.  $\beta$  means standardized regression beta coefficients. Adjusted R<sup>2</sup> expresses the percentage of the variance explained by the independent variables in the different models (i.e. 0.101 is 10.1%). Statistical significant values are in bold.

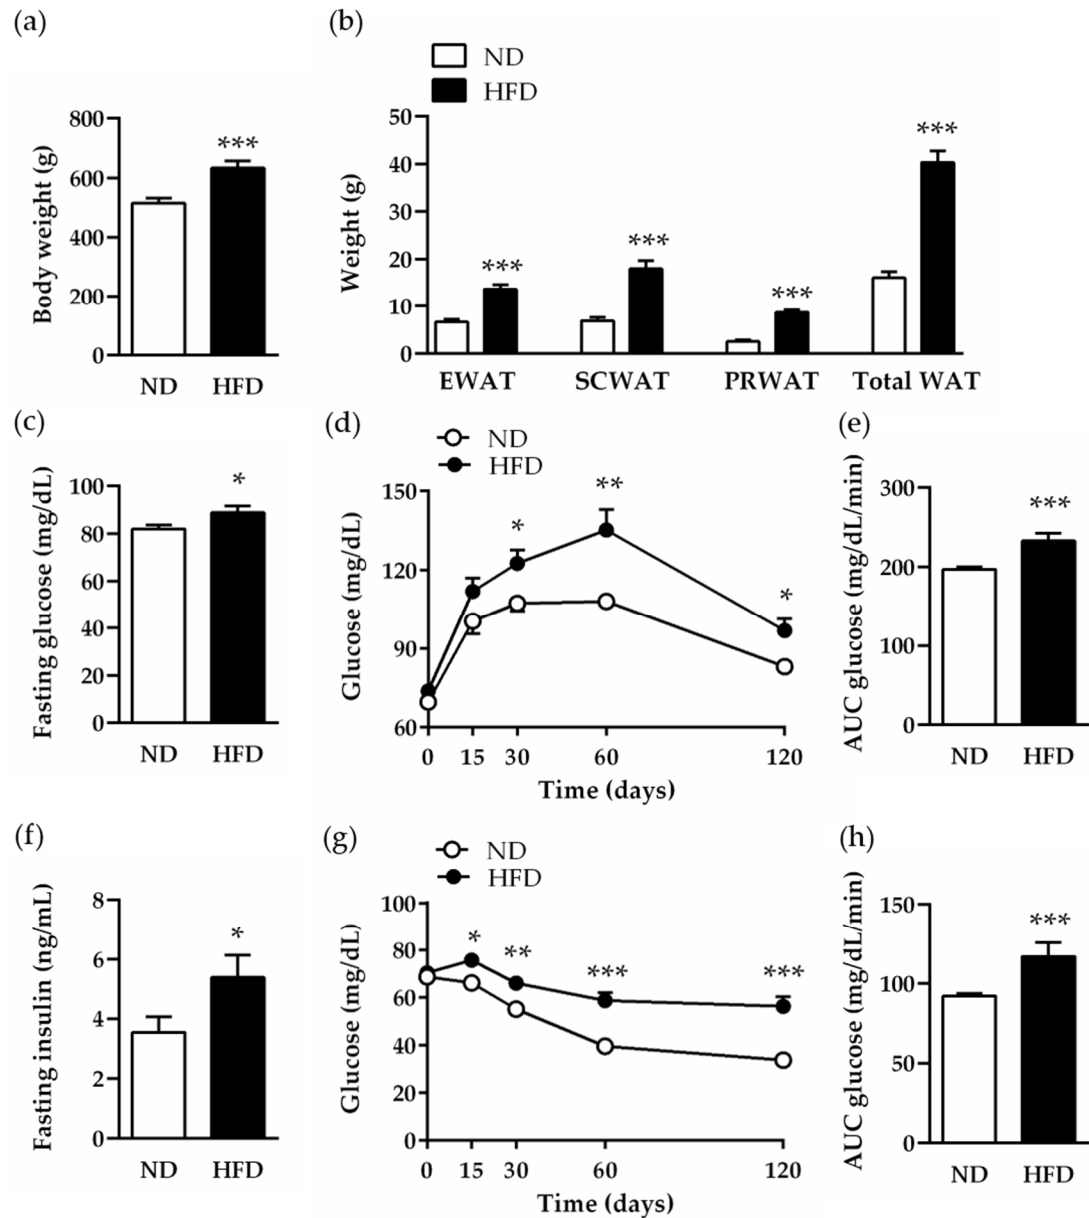

**Figure S1.** Increased body weight, whole-body adiposity, impaired glucose tolerance and insulin resistance in rats with diet-induced obesity. Bar graphs show the (a) body weight, (b) epididymal (EWAT), subcutaneous (SCWAT), perirenal (PRWAT) and total white fat content as well as fasting serum (c) glucose and (f) insulin of lean and diet-induced obese rats. Blood glucose levels and area under the curve (AUC) during OGTT (d and e) and IPITT (g and h) in rats fed a normal diet (ND) or a high-fat diet (HFD). Statistical differences were analyzed by using a Student's *t* test. \* $P < 0.05$ , \*\* $P < 0.01$ , \*\*\* $P < 0.001$  vs control rats fed a ND.

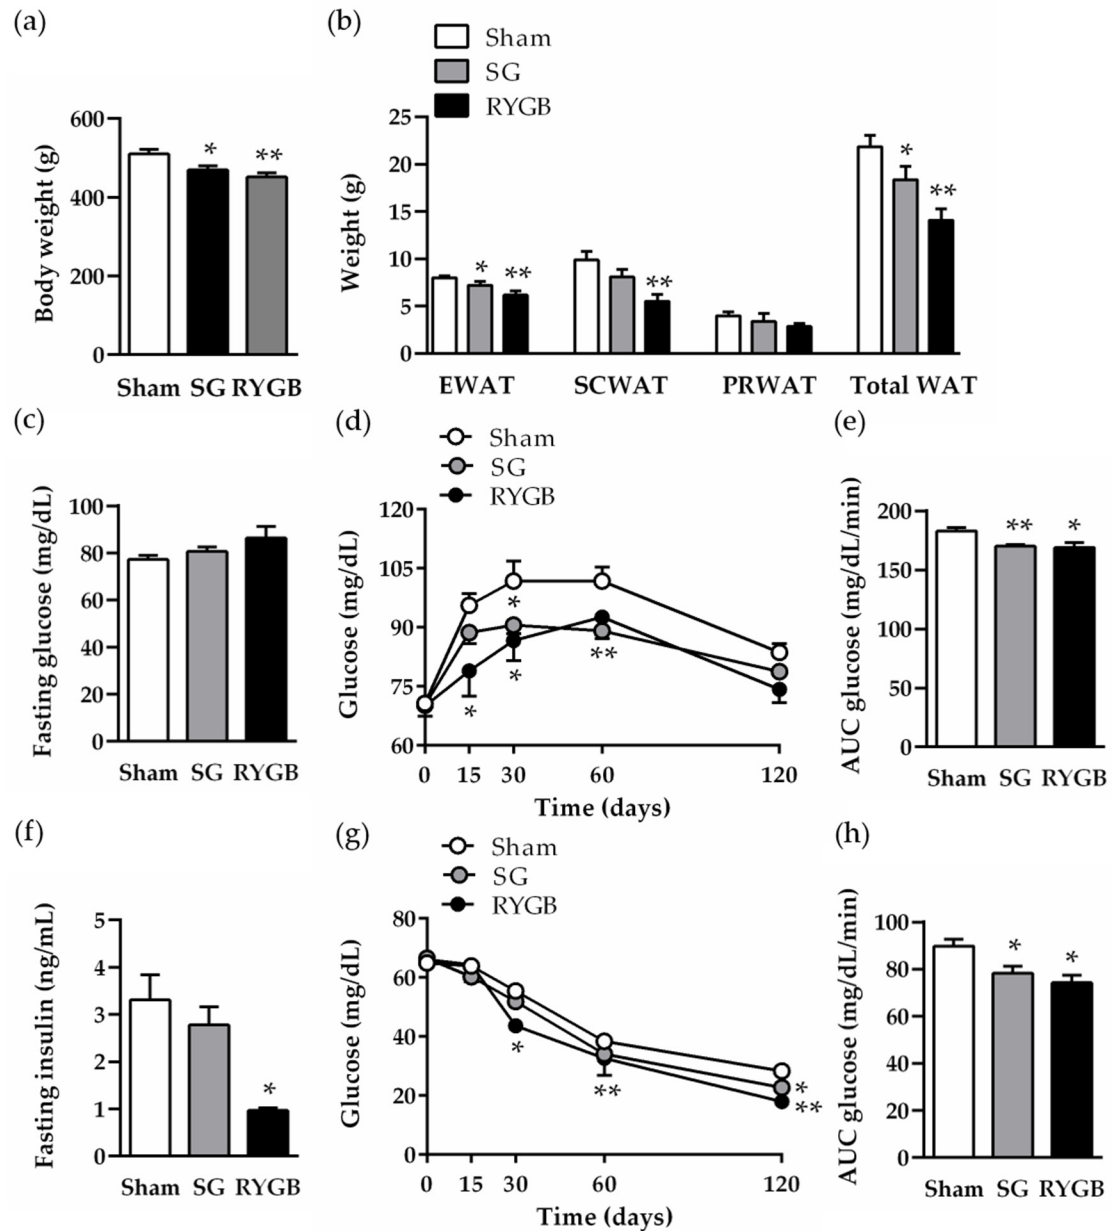

**Figure S2.** Bariatric surgery improved body weight, whole-body adiposity, glucose tolerance and insulin sensitivity of rats with diet-induced obesity. Bar graphs show the (a) body weight, (b) epididymal (EWAT), subcutaneous (SCWAT), perirenal (PRWAT) and total white fat content as well as fasting serum (c) glucose and (f) insulin of rats with diet-induced obesity one month after sham surgery, sleeve gastrectomy (SG) or Roux-en-Y gastric bypass (RYGB). Blood glucose levels and area under the curve (AUC) during OGTT (d and e) and IPITT (g and h) in obese rats submitted to sham surgery, SG or RYGB. Statistical differences were analyzed by one-way ANOVA followed by a Tukey's test. \* $P < 0.05$ , \*\* $P < 0.01$  vs obese rats submitted to sham surgery.
